# Supplementary material for: Improvement of contact lens-associated dry eye disease with the use of hydrogen peroxide
Source: PeerJ. 2024 Dec 6;12:e18482. doi: 10.7717/peerj.18482 (PMC11627073; doi:10.7717/peerj.18482)
Supplement: Data S1 [file peerj-12-18482-s001.xlsx]

## Sheet: Subescalas OSDI
ID	OSDI_1	OSDI_2	OSDI_3	OSDI_4	OSDI_5	OSDI_6	OSDI_7	OSDI_8	OSDI_9	OSDI_10	OSDI_11	OSDI_12		Uncomfortable for more than a year_0	up to 8 hours_0	more than 16 hours of use_0	Over 40_0youths_1	Fem_0Male_1	OSDI_1_F	OSDI_2_F	OSDI_3_F	OSDI_4_F	OSDI_5_F	OSDI_6_F	OSDI_7_F	OSDI_8_F	OSDI_9_F	OSDI_10_F	OSDI_11_F	OSDI_12_F			years uncomfortable	years wears CL	i_VA_farD_OD	I_VA_farD_OI	F_VA_farD_OD	F_VA_farD_OI	Geometry_sph0_toric1_multif2	hours of use	days of use per week	bulbar hyperemia_Initial	bulbar hyperemia_final
1	1	1	3	3	4	4	3	3	2	0	3	3		1	0	0	0	1	1	0	1	1	0	0	0	0	NS/NC	0	3	3			more than 3 years	more than 16	0.8	0.8	1	1	2	8	7	2	0
2	2	0	2	0	1	2	4	2	0	2	0	1		0	0	0	0	0	1	0	4	0	0	0	0	0	0	NS/NC	1	0			1 year	more than 16	0.8	0.9	1	1	1	8	6	1	1
4	1	0	1	1	1	0	0	3	2	0	0	0		1	0	0	0	0	0	0	0	0	0	0	0	0	1	0	0	0			2 years	more than 16	1	0.9	1	1	1	8	7	1	0
5	3	4	3	1	1	0	2	0	NS/NC	3	4	4		0	0	1	0	0	2	4	3	3	3	1	1	1	1	4	3	4			3 months	less than 1	1	1	1	1	2	8	6	0	0
6	1	2	NS/NC	2	1	3	NS/NC	3	NS/NC	1	0	NS/NC		0	1	1	0	0															2 months	12	1	1	1	1	1	10	6	2	0
7	2	2	1	1	1	1	1	0	0	1	0	2		1	1	0	0	0	1	0	0	0	0	0	0	0	0	0	0	0			2 years	more than 16	1	1	1	1	0	10	5	1	0
8	1	1	2	2	2	1	2	2	1	0	3	3		0	0	1	1	0	1	1	2	1	1	1	1	2	1	0	2	2			6 months	14	1	1	1	1	0	8	6	0	0
9	0	1	2	1	1	3	1	0	1	1	2	2		1	1	0	0	0	0	1	1	2	1	1	0	1	1	0	1	1			2 years	more than 16	0.7	0.8	0.7	0.8	0	9	7	2	1
10	1	3	0	0	0	0	NS/NC	0	0	NS/NC	0	3		1	0	1	1	0	1	0	2	0	0	0	NS/NC	1	0	0	1	1			2 years	4	1	1	1	1	0	8	7	1	0
11	1	1	1	1	0	1	2	2	1	1	1	2		1	0	0	0	0	2	3	1	1	0	0	0	0	1	0	2	2			more than 3 years	more than 16	1	1	1	1	0	8	7	2	0
12	3	1	2	1	0	0	1	1	0	2	1	2		0	0	0	0	0	2	0	1	0	0	0	0	0	0	1	0	1			5 months	more than 16	1	1	1	1	1	8	7	1	1
13	1	0	2	1	0	0	1	1	1	0	1	1		1	0	0	0	1	0	0	1	0	0	1	0	0	1	0	1	1			2 years	more than 16	0.9	0.8	0.9	0.8	2	8	7	1	1
14	1	1	2	2	2	1	1	0	0	3	2	2		0	0	1	0	0	1	0	0	0	0	1	1	0	0	1	1	0			4 months	less than 1	1	1	1	1	2	6	7	1	0
15	1	0	1	1	4	0	4	0	0	0	1	2		1	0	0	1	0	0	0	1	0	0	0	0	0	0	1	1	4			2 years	more than 16	0.6	0.8	0.7	0.9	1	8	7	1	0
18	1	0	0	3	3	4	3	2	2	0	2	0		1	1	0	0	1	1	0	1	1	2	0	2	2	2	0	0	0			2 years	more than 16	1	1	1	1	0	9	7	2	1
19	0	0	0	1	1	0	0	2	2	0	0	1		1	1	1	1	0	0	0	0	0	0	0	0	0	0	0	0	0			2 years	10	1	1	1	1	1	10	4	1	0
20	0	1	3	0	0	0	0	3	0	2	2	0		0	0	1	1	0	0	1	3	0	0	0	0	3	0	2	2	0			3 months	2	1	1	1	1	0	7	5	1	0
21	3	2	2	1	0	0	0	0	0	1	0	0		0	1	1	1	0	3	1	1	0	0	0	0	0	0	0	0	0			1 year	6	1	0.8	1	0.9	1	9	6	1	1
22	3	1	3	1	0	1	0	0	0	1	2	2		1	0	0	0	1	1	0	0	1	0	0	0	0	0	1	1	1			3 years	more than 16	1	0.9	1	0.9	1	8	7	2	1
23	1	2	1	1	1	3	1	1	0	1	2	3		1	1	0	0	1	0	0	0	0	0	0	0	0	0	0	0	0			2 years	more than 16	1	0.9	1	0.9	2	14	7	1	1
24	2	4	4	4	2	4	3	2	0	3	4	NS/NC		0	0	1	1	0	4	1	3	4	4	3	1	3	NS/NC	1	NS/NC	NS/NC			1 year	10	0.9	0.9	1	1	1	6	4	0	0
25	1	1	0	2	0	0	0	2	2	2	0	0		0	1	1	1	0	1	1	0	1	0	0	0	1	0	0	1	1			1 year	11	1	1	1	1	0	10	7	1	0
27	4	1	0	3	3	3	4	1	0	1	0	1		0	0	0	0	0	3	0	0	1	0	0	0	0	0	1	0	0			1 year	more than 16	0.9	0.9	1	1	2	8	6	1	1
28	3	0	1	0	0	1	0	3	3	1	1	3		1	0	1	1	1	3	0	0	0	0	1	0	2	2	1	1	3			more than 3 years	7	1	1	1	1	0	8	5	1	1
31	3	1	1	2	1	2	NS/NC	0	0	3	2	3		1	0	0	1	0	1	0	1	1	0	0	NS/NC	0	0	2	NS/NC	1			3 years	more than 16	0.8	0.8	1	1	1	8	7	1	0
32	2	1	1	1	1	1	1	1	1	1	1	2		1	0	1	1	1	1	1	0	1	1	2	1	1	1	0	1	1			more than 3 years	7	0.9	1	0.8	0.9	1	8	7	0	1
33	4	1	1	1	0	1	0	0	1	4	1	0		0	1	1	1	1	4	2	1	1	1	1	1	1	2	3	3	0			6 months	6	1	1	1	1	1	13	7	1	1
34	0	1	1	0	0	NS/NC	2	3	1	2	1	NS/NC		0	1	1	0	1	0	0	0	0	0	0	0	0	0	1	1	1			2 months	2	1	1	1	1	0	14	7	2	1
36	1	0	1	3	2	2	0	2	1	3	0	1		0	0	1	1	0	1	0	1	1	1	2	NS/NC	1	1	1	0	1			3 months	9	0.9	0.9	1	1	1	6	4	1	1
37	1	0	1	1	1	4	2	1	1	2	0	1		1	0	0	0	1	0	0	0	0	0	0	0	NS/NC	0	0	0	0			more than 3 years	more than 16	1	1	1	1	1	2	5	0	0
38	2	1	2	1	1	0	0	1	0	2	0	0		1	1	1	1	1	0	0	0	0	0	NS/NC	0	0	0	1	0	0			2 years	5	1	1	1	1	0	9	5	1	1
39	2	2	1	2	2	2	1	1	3	2	1	1		0	0	0	1	0	2	1	1	1	0	1	1	1	1	2	1	1			1 year	more than 16	0.7	0.8	0.8	0.8	1	2	7	2	1
40	0	3	0	4	3	2	0	1	0	3	2	2		1	0	1	1	0	0	2	1	2	2	2	0	2	0	2	2	0			3 years	3	0.7	0.8	0.7	0.8	1	4	5	1	0
41	0	1	0	1	1	1	0	0	0	1	0	2		1	1	0	0	0	0	1	0	1	0	1	NS/NC	0	0	1	0	1			more than 3 years	more than 16	0.9	0.8	0.9	0.8	2	16	7	0	0
42	1	1	2	3	3	3	1	3	1	0	0	1		1	0	1	1	0	0	1	0	1	1	0	0	0	0	0	1	0			3 years	10	0.9	0.9	0.9	0.9	1	6	7	2	1
43	2	0	2	1	0	3	NS/NC	3	2	3	NS/NC	2		1	0	1	1	0	0	0	0	1	1	1	0	1	1	2	0	1			2 years	3	1	0.4	0.9	0.4	1	8	3	1	0
44	1	0	0	1	1	0	0	0	0	2	1	2		1	1	1	1	0	0	0	1	0	1	0	NS/NC	0	0	0	1	NS/NC			more than 3 years	7	1	1	1	1	0	9	7	0	0
45	0	1	0	1	0	0	0	2	0	0	1	1		0	0	0	0	0	0	1	0	NS/NC	NS/NC	0	0	0	0	1	0	0			5 months	more than 16	1	1	1	1	2	8	7	1	0
